1 **Highly sensitive in situ proteomics with cleavable fluorescent tyramide**  
2 **reveals human neuronal heterogeneity**  
3

4  
5 Renjie Liao<sup>1,†</sup>, Manas Mondal<sup>1,†</sup>, Christopher D. Nazaroff<sup>1,2</sup>, Diego Mastroeni<sup>3,4</sup>,  
6 Paul D. Coleman<sup>3,4</sup>, Jia Guo<sup>1,\*</sup>  
7  
8  
9

10 <sup>1</sup>Biodesign Institute & School of Molecular Sciences, Arizona State University, Tempe, Arizona 85287, USA.  
11 <sup>2</sup>Division of Pulmonary Medicine, Department of Biochemistry and Molecular Biology, Mayo Clinic Arizona,  
12 Scottsdale, Arizona 85259, USA. <sup>3</sup>ASU-Banner Neurodegenerative Disease Research Center, Biodesign  
13 Institute and School of Life Sciences, Arizona State University, Tempe, Arizona 85287, USA. <sup>4</sup>L.J. Roberts  
14 Center for Alzheimer's Research, Banner Sun Health Research Institute, Sun City, Arizona 85351, USA. <sup>†</sup>These  
15 authors contributed equally: Renjie Liao, Manas Mondal. Correspondence and requests for materials should  
16 be addressed to J.G. (email: [jiaguo@asu.edu](mailto:jiaguo@asu.edu))  
17  
18  
19  
20  
21  
22  
23  
24  
25  
26

1 Abstract

2

3 The ability to comprehensively profile proteins in intact tissues in situ is crucial for our  
4 understanding of health and disease. However, the existing methods suffer from low  
5 sensitivity and limited sample throughput. To address these issues, here we present a  
6 highly sensitive and multiplexed in situ protein analysis approach using cleavable  
7 fluorescent tyramide and off-the-shelf antibodies. Compared with the current methods, this  
8 approach enhances the detection sensitivity and reduces the imaging time by 1-2 orders of  
9 magnitude, and can potentially detect hundreds of proteins in intact tissues at the optical  
10 resolution. Applying this approach, we studied protein expression heterogeneity in a  
11 population of genetically identical cells, and performed protein expression correlation  
12 analysis to identify coregulated proteins. We also profiled >6000 neurons in a human  
13 formalin-fixed paraffin-embedded (FFPE) hippocampus tissue. By partitioning these  
14 neurons into varied cell clusters based on their multiplexed protein expression profiles, we  
15 observed different subregions of the hippocampus consist of neurons from distinct  
16 clusters.

17

18

19

1 Comprehensive protein profiling in individual cells of intact tissues in situ holds great  
2 promise to unlock major mysteries in neuroscience, cancer and stem cell biology<sup>1</sup>, since it  
3 can reveal the spatial organization, gene expression regulation, and interactions of the  
4 diverse cell types in complex multicellular organisms. Mass spectrometry<sup>2</sup> and microarray  
5 technologies<sup>3</sup> have been widely used for proteomics analysis. However, as these  
6 approaches are carried out on extracted and purified proteins from populations of cells,  
7 they lose the protein location information and conceal the single-cell expression variations  
8 in the sample. Fluorescence microscopy is a powerful tool to study protein expressions in  
9 individual cells in their native spatial contexts. However, due to the spectral overlap of  
10 organic fluorophores<sup>4-6</sup> and fluorescent proteins<sup>7,8</sup>, conventional protein imaging  
11 technologies only allow a handful of proteins to be detected in one specimen.

12  
13 To enable multiplexed single-cell protein analysis, a number of methods have been  
14 explored recently, such as mass cytometry<sup>9</sup>, single cell barcode chips<sup>10-12</sup>, and DNA-  
15 antibody barcoded arrays<sup>13</sup>. Nonetheless, as protein spatial complexity are masked in these  
16 approaches, they can not be applied to profile proteins in intact tissues in situ<sup>14</sup>. To address  
17 this issue, cyclical immunofluorescence<sup>15-23</sup> and mass cytometry imaging<sup>24,25</sup> have been  
18 developed. However, with the detection tags directly conjugated to antibodies, these  
19 existing methods have low detection sensitivity. This limitation hinders their applications  
20 to study proteins with low expression levels. Additionally, the low sensitivity of the current  
21 methods also limit their ability to profile proteins in highly autofluorescent tissues, such as  
22 formalin-fixed paraffin-embedded (FFPE) tissues<sup>26</sup>, which are the most common type of  
23 preserved clinical samples<sup>27</sup>. Moreover, the existing methods have limited sample  
24 throughput, as they require pixel-by-pixel sample analysis<sup>24,25</sup> or high magnification  
25 objectives and long exposure time to detect the protein targets<sup>15-23</sup>.

26  
27 Here, we report a highly sensitive and multiplexed in situ protein analysis approach with  
28 cleavable fluorescent tyramide (CFT). In this approach, target proteins are sensitively  
29 detected by a signal amplification method using off-the-shelf horseradish peroxidase (HRP)  
30 conjugated antibodies and CFT. Upon continuous cycles of target staining, fluorescence  
31 imaging, fluorophore cleavage and HRP deactivation, this approach has the potential to  
32 quantify hundreds of different proteins in individual cells of intact tissues at the optical  
33 resolution. To demonstrate the feasibility of this approach, we designed and synthesized  
34 CFT. We showed that the detection sensitivity and sample throughput of our approach are  
35 orders of magnitude higher than those of the existing methods. We also demonstrated that  
36 tris(2-carboxyethyl)phosphine (TCEP) can efficiently cleave the fluorophores and  
37 simultaneously deactivate HRP, while maintaining protein targets antigenicity. We  
38 validated our approach in HeLa cells and showed excellent agreement with conventional  
39 immunohistochemistry (IHC) results. Using this approach, we studied protein expression  
40 heterogeneity in a population of genetically identical cells, and performed the protein  
41 expression correlation analysis to identify coregulated proteins. We also applied this  
42 approach to investigate the neuronal heterogeneity in the human hippocampus, and  
43 demonstrated that distinct subregions of the hippocampus are composed of varied neuron  
44 clusters.

45

## 1 **Results**

### 2 **Platform design**

3 As shown in Figure 1A, this protein profiling technology consists of three major steps in  
4 each analysis cycle. First, protein targets are recognized by HRP conjugated antibodies. And  
5 HRP catalyzes the coupling reaction between CFT and the tyrosine residues on the  
6 endogenous proteins in close proximity. In the second step, fluorescence images are  
7 captured to generate quantitative protein expression profiles. Finally, the fluorophores  
8 attached to tyramide are chemically cleaved and simultaneously HRP is deactivated, which  
9 allows the initiation of the next analysis cycle. Through reiterative cycles of target staining,  
10 fluorescence imaging, fluorophore cleavage and HRP deactivation, a large number of  
11 different proteins with a wide range of expression levels can be quantified in single cells of  
12 intact tissues in situ.

13

### 14 **Design and synthesis of CFT**

15 To enable fluorescence signal removal after protein staining, we designed CFT by tethering  
16 fluorophores to tyramide through a chemically cleavable linker. A critical requirement for  
17 the success of this technology is to efficiently cleave the fluorophores in the cellular  
18 environment while maintaining the protein antigenicity. Additionally, it is preferred that  
19 the linker has a small size, so that HRP can still recognize CFT as a good substrate and the  
20 diffusion of short-lived tyramide radical<sup>28</sup> is not compromised. Recently, our laboratory has  
21 developed an azide-based cleavable linker<sup>21</sup>, which satisfies all of those requirements.  
22 Thus, we incorporated that linker into CFT. Most of tissues exhibit prominent  
23 autofluorescence from the green and yellow emission channels, while only minimal  
24 autofluorescence is detected in the red emission channel<sup>29</sup>. To avoid the significant green  
25 and yellow autofluorescence background, in the current study we selected Cy5 as the  
26 fluorophore for CFT.

27

28 Synthesis of CFT (tyramide-N<sub>3</sub>-Cy5) (Figure 1B) was carried out by coupling of tyramine  
29 and the Cy5 conjugated cleavable linker (Scheme S1). After purified by high performance  
30 liquid chromatography (HPLC), the prepared CFT was characterized by mass spectrometry  
31 and nuclear magnetic resonance (NMR) spectroscopy. The detailed synthesis and  
32 characterization of CFT is described in the supporting information.

33

### 34 **Significantly enhanced detection sensitivity**

35 We next assessed the detection sensitivity of our approach by comparing it with direct and  
36 indirect immunofluorescence, which have similar sensitivity to the current multiplexed in  
37 situ protein profiling approaches<sup>14</sup>. Applying conventional immunofluorescence methods,  
38 we stained protein Ki67 in HeLa cells with Cy5 labeled primary antibodies (Figure 2A), and  
39 unlabeled primary antibodies together with Cy5 labeled secondary antibodies (Figure 2B).  
40 Using our approach, protein Ki67 was stained with unlabeled primary antibodies and HRP  
41 conjugated secondary antibodies along with tyramide-N<sub>3</sub>-Cy5 (Figure 2C). With primary  
42 antibodies of the same concentration, our method is ~88 and ~35 times more sensitive  
43 than direct and indirect immunofluorescence, respectively (Figure 2D). Additionally, the  
44 staining resolution of the three methods closely resembles each other (Figure 2A-C). These  
45 results suggest that HRP can still recognize CFT as a good substrate and the incorporation

1 of the cleavable linker into CFT does not interfere with the diffusion of the CFT radical.  
2 More importantly, the extremely high sensitivity of our approach enables the quantitative  
3 in situ analysis of low-abundance proteins, which could be undetectable by the reported  
4 methods. Moreover, by reducing the imaging time by 1-2 orders of magnitude, our method  
5 allows a large number of individual cells to be profiled in a short time, which leads to the  
6 dramatically improved sample throughput and minimized assay time.

### 7 8 **Efficient fluorophore cleavage without loss of protein antigenicity**

9 We next explored whether the fluorophores can be efficiently cleaved while maintaining  
10 the protein antigenicity. To search for this ideal cleavage condition, we stained protein  
11 Ki67 in HeLa cells using HRP conjugated antibodies and tyramide-N<sub>3</sub>-Cy5, and evaluated  
12 the fluorophore cleavage efficiencies at different temperature. After incubating with tris(2-  
13 carboxyethyl)phosphine (TCEP) at 37°C, 50°C and 65°C for 30 minutes, over 85%, 90% and  
14 95% of the staining signals were removed, respectively (Figure S1). To test whether the  
15 protein antigenicity remains at those varied cleavage temperature, we incubated HeLa cells  
16 with TCEP at 37°C, 50°C and 65°C for 24 hours, and subsequently stained protein Ki67 with  
17 tyramide-N<sub>3</sub>-Cy5. We also labeled protein Ki67 without any pre-treatment as controls. The  
18 cells with the TCEP incubation at 37°C and 50°C have similar staining intensities to the  
19 control cells; while the cells pretreated at 65°C only have about half of the staining  
20 intensities compared to the control cells (Figure S2). We then studied the fluorophore  
21 cleavage kinetics at 50°C by incubating the stained cells with TCEP for 5, 15, 30 and 60  
22 minutes. Among these conditions, 30 minutes is the minimum cleavage time required to  
23 achieve the maximum cleavage efficiency (Figure S3). These results indicate that the  
24 fluorescence signals generated by staining with CFT can be efficiently removed by the TCEP  
25 treatment at 50°C for 30 minutes, and this condition preserves the protein antigenicity.

### 26 27 **Simultaneous fluorophore cleavage and HRP activation**

28 Another critical requirement for the success of this approach is that HRP needs to be  
29 deactivated at the end of each analysis cycle, so that it will not generate false positive  
30 signals in the next cycle. To explore whether TCEP can deactivate HRP and cleave  
31 fluorophores simultaneously, we stained proteins ILF3 (Figure 3A), HMGB1, HDAC2,  
32 TDP43, PABPN1, hnRNP A1, Nucleolin, H4K16ac, hnRNP K and Nucleophosmin (Figure S4)  
33 in HeLa cells using HRP conjugated antibodies and tyramide-N<sub>3</sub>-Cy5. After TCEP incubation  
34 at 50°C for 30 minutes, the fluorescence signals were efficiently removed, yielding the  
35 on/off ratios of over 10:1 (Figure 3B,D,S4). We then incubated the cells with tyramide-N<sub>3</sub>-  
36 Cy5 again. For all the proteins under study, no further fluorescence signal increases were  
37 observed (Figure 3C,D,S4). These results confirm that the protein staining signals  
38 generated by CFT can be efficiently erased by TCEP, and also indicate that TCEP can  
39 deactivate HRP simultaneously.

### 40 41 **Multiplexed in situ protein profiling in HeLa cells**

42 To demonstrate the feasibility of applying CFT for multiplexed protein analysis, we labeled  
43 10 distinct proteins in individual HeLa cells in situ. Through reiterative staining cycles,  
44 proteins HMGB1, HDAC2, TDP43, PABPN1, hnRNP A1, Nucleolin, H4K16ac, hnRNP K, ILF3  
45 and Nucleophosmin were unambiguously detected with the HRP conjugated antibodies and  
46 tyramide-N<sub>3</sub>-Cy5 in the same set of cells (Figure 4). We also stained these 10 protein

1 targets in 10 different sets of cells by conventional tyramide signal amplification (TSA)  
2 assays using Cy5 labeled tyramide (Figure S5). The protein distribution patterns obtained  
3 by the two methods are consistent with each other. We also compared the mean protein  
4 abundances per cell measured by our CFT-based approach and conventional  
5 immunofluorescence with TSA. For all the 10 proteins with varied expression levels, the  
6 results obtained using the two methods closely resemble each other (Figure 5A).  
7 Comparison of the two sets of results yields an  $R^2$  value of 0.99 with a slope of 1.13 (Figure  
8 5B). These results indicate that our approach allows quantitative and multiplexed protein  
9 profiling in individual cells in situ.

10

### 11 **Protein expression heterogeneity and correlation**

12 As shown in many experiments, genetically identical cells can exhibit significant gene  
13 expression variations among individual cells<sup>30-36</sup>. To explore such cell-to-cell protein  
14 expression heterogeneity in HeLa cells, we analyzed the distribution of the single-cell  
15 protein expression levels. As shown in Figure 6A, the single-cell protein abundances are  
16 distributed in a wide range. This significant expression heterogeneity results in the  
17 relatively large error bars in Figure 5. For all the ten measured proteins, the square of the  
18 expression standard deviation is much higher than the mean expression levels (Figure 6A).  
19 These results suggest that these proteins are generated in translational bursts, rather than  
20 at a constant rate<sup>37</sup>.

21

22 By analyzing expression covariation of different proteins, one can study which proteins are  
23 coregulated to elucidate their regulatory pathways. For bulk cell analysis, such studies  
24 usually require external stimuli to introduce varied gene expression among different cell  
25 populations. At the single-cell level, stochastic gene expression variation is generated in  
26 individual cells. By taking advantage of this natural expression fluctuation, one can perform  
27 single cell expression covariation analysis to refine existing regulatory pathways, suggest  
28 new regulatory pathways, and predict the function of unannotated proteins<sup>38</sup>. Applying this  
29 approach, we studied the pairwise expression correlation of the ten measured proteins  
30 (Figure S6), and calculated the correlation coefficient of each protein pair (Figure 6B).  
31 Some of protein pairs show highly correlated covariation with correlation coefficients of  
32  $\sim 0.8$ , such as TDP43 and hnRNP A1 along with Nucleolin and Nucleophosmin. To further  
33 explore the regulatory network among the measured proteins, we adopted a hierarchical  
34 clustering approach<sup>39</sup> (Figure 6B). On the generated cluster tree, we identified a group of  
35 eight proteins with substantially correlated expression patterns (Figure 6B). Indeed, all the  
36 eight proteins in this identified group are involved in the transcriptional regulation and  
37 processing related pathways<sup>40-47</sup>.

38

### 39 **Multiplexed in situ protein profiling in FFPE human hippocampus**

40 The various cell types in the brain cooperate collectively to achieve high-order mental  
41 functions. To accurately observe and precisely manipulate brain activities, it is required to  
42 have much greater knowledge of the molecular identities of specific cell types. This  
43 knowledge is also fundamental to the discovery of the cell-type targeted therapy to treat  
44 brain disorders. The identities of neurons are determined by their locations, protein, RNA,  
45 and DNA profiles, etc. However, the current molecular classification of human neurons is  
46 only defined by single-cell RNA-seq<sup>48,49</sup>. No systematic analysis of neuronal heterogeneity



1 has been reported based on protein expression or molecular profiling in their natural  
2 spatial contexts. Additionally, FFPE postmortem tissues are the major source of human  
3 brains with unlimited regional sampling and depth. However, the limited sensitivity of the  
4 existing multiplexed in situ protein analysis methods hinders their applications to profile  
5 the partially degraded proteins<sup>50</sup> in highly autofluorescent FFPE tissues<sup>26</sup>.

6  
7 To explore the human neuronal heterogeneity by multiplexed in situ protein profiling and  
8 also to assess the feasibility of applying CFT for analyzing FFPE tissues, we stained 8  
9 proteins sequentially in the human hippocampus using HRP conjugated antibodies and  
10 tyramide-N<sub>3</sub>-Cy5. Of the 8 proteins, NeuN was selected as the neuronal marker<sup>51</sup>, and  
11 PABPN1, HMGB1, TDP43, hnRNP A1, hnRNP K, ILF3 along with Nucleophosmin were  
12 selected as the components of the transcriptional regulation and processing  
13 pathways<sup>41,42,44-47,52</sup>. Due to the high sensitivity of our approach, the imaging exposure time  
14 can be minimized without compromising the analysis accuracy. As a result, the whole  
15 tissue (~1 cm × 1 cm) was imaged within 30 minutes in each cycle. With 8 reiterative  
16 staining cycles, all the proteins of interest were successfully detected in the tissue (Figure  
17 7). These results suggest that our approach enables multiplexed single-cell in situ protein  
18 profiling in FFPE tissues with high sample throughput and short assay time.

### 19 **Human neuronal heterogeneity and their spatial organization in the hippocampus**

20 With the multiplexed single-cell in situ protein profiling results, we explored the neuronal  
21 heterogeneity and their spatial organization in the human hippocampus. In the examined  
22 tissue, we calculated the protein expression levels in >6000 individual neurons, which  
23 were identified by the neuronal marker NeuN<sup>51</sup>. We then applied the software viSNE<sup>53</sup> to  
24 partition the individual neurons into 10 clusters (Figure 8A) based on their protein  
25 expression profiles (Figure 9,S7). By mapping these 10 clusters of cells back to their natural  
26 locations in the tissue (Figure 8B,S8,S9), we observed that different subregions of the  
27 hippocampus consist of neurons from distinct clusters. For example, the dentate gyrus  
28 (DG) contains all the clusters except cluster 7, while the Cornu Ammonis (CA) fields are  
29 dominated by clusters 3, 6, 7, and 8. Within the CA fields, cluster 7 only appears in CA1, CA2  
30 and CA3, but not in CA4 (Figure 10A). In the DG, cluster 2 is the major cell class in the  
31 regions of interest (ROI) 1-5. In contrast, other subregions of the DG are mainly composed  
32 of clusters 1, 3, 4, 9 and 10 (Figure 10B). These results suggest that our approach allows  
33 the investigation of the different cell type compositions and their spatial organizations in  
34 FFPE tissues.

### 35 **Discussion**

36  
37 In this study, we have designed and synthesized cleavable fluorescent tyramide, and  
38 applied it for multiplexed protein profiling in single cells of FFPE tissues in situ. Compared  
39 with the existing multiplexed protein imaging technologies, our approach has enhanced the  
40 detection sensitivity by 1-2 orders of magnitude. Additionally, by minimizing the imaging  
41 time and avoiding the pixel-by-pixel data acquisition, our method enables the whole-slide  
42 scanning within 30 minutes, which dramatically increases the sample throughput and  
43 reduces the assay time. Applying our approach, we have shown that different subregions of  
44 the human hippocampus consist of varied neuron clusters. Interestingly, these distinct  
45

1 clusters are defined only on the basis of the protein expression profiles, without  
2 incorporating the cellular spatial information into the clustering algorithm. These results  
3 suggest that the varied activity patterns and different microenvironment may contribute to  
4 the neuronal heterogeneity in the human hippocampus.

5  
6 The multiplexing capacity of our in situ protein profiling approach depends on two factors:  
7 the cycling number and the number of proteins interrogated in each cycle. TCEP can  
8 efficiently remove the fluorophores within 30 minutes, while the antigenicity of protein  
9 targets is preserved after incubation with TCEP for more than 24 hours. These results  
10 suggest that at least ~50 cycles can be carried out in one specimen. Coupled with the  
11 various established antibody stripping methods<sup>54</sup> or HRP inactivation methods<sup>55</sup>, our  
12 approach will enable four or five different protein targets to be profiled in each analysis  
13 cycle using CFT with distinct fluorophores (Figure S10). Therefore, we envision that this  
14 CFT-based approach has the potential to detect hundreds of protein targets in the same  
15 tissue.

16  
17 The cleavable fluorescent tyramide developed here can also be applied in other areas  
18 beyond protein analysis, such as DNA or RNA in situ hybridization<sup>56</sup> and metabolic  
19 analysis<sup>57</sup>. The combination of these applications will enable the integrated DNA, RNA,  
20 protein and metabolic analysis at the optical resolution in intact tissues. Furthermore,  
21 coupled with a program-controlled microfluidic system<sup>58</sup>, a standard fluorescence  
22 microscope can be easily converted into an automatic highly multiplexed tissue imaging  
23 system. This comprehensive molecular imaging platform will bring new insights into cell  
24 signaling regulation, cell heterogeneity, cellular microenvironment, molecular diagnosis  
25 and cellular targeted therapy.

26  
27

## 28 **References:**

- 29 1. Crosetto, N., Bienko, M. & Oudenaarden, A. Van. Spatially resolved transcriptomics  
30 and beyond. *Nat. Rev. Genet.* **16**, 57–66 (2014).
- 31 2. Altelaar, a F. M., Munoz, J. & Heck, A. J. R. Next-generation proteomics: towards an  
32 integrative view of proteome dynamics. *Nat. Rev. Genet.* **14**, 35–48 (2012).
- 33 3. Espina, V. *et al.* Protein microarrays: Molecular profiling technologies for clinical  
34 specimens. *Proteomics* **3**, 2091–2100 (2003).
- 35 4. Guo, J., Wang, S., Dai, N., Teo, Y. N. & Kool, E. T. Multispectral labeling of antibodies  
36 with polyfluorophores on a DNA backbone and application in cellular imaging. *Proc.*  
37 *Natl. Acad. Sci. U. S. A.* **108**, 3493–3498 (2011).
- 38 5. Cook, N. P., Kilpatrick, K., Segatori, L. & Martí, A. A. Detection of  $\alpha$ -synuclein  
39 amyloidogenic aggregates in vitro and in cells using light-switching  
40 dipyrrophenazine ruthenium(II) complexes. *J. Am. Chem. Soc.* **134**, 20776–20782  
41 (2012).
- 42 6. Martí, A. A., Jockusch, S., Stevens, N., Ju, J. & Turro, N. J. Fluorescent hybridization  
43 probes for sensitive and selective DNA and RNA detection. *Acc. Chem. Res.* **40**, 402–



- 1 409 (2007).
- 2 7. Lemieux, M. *et al.* Translocation of CaMKII to dendritic microtubules supports the  
3 plasticity of local synapses. *J. Cell Biol.* **198**, 1055–1073 (2012).
- 4 8. Dore, K., Labrecque, S., Tardif, C. & De Koninck, P. FRET-FLIM investigation of PSD95-  
5 NMDA receptor interaction in dendritic spines; control by calpain, CaMKII and Src  
6 family kinase. *PLoS One* **9**, (2014).
- 7 9. Bendall, S. C. *et al.* Single-cell mass cytometry of differential immune and drug  
8 responses across a human hematopoietic continuum. *Science* **332**, 687–696 (2011).
- 9 10. Fan, R. *et al.* Integrated barcode chips for rapid, multiplexed analysis of proteins in  
10 microliter quantities of blood. *Nat. Biotechnol.* **26**, 1373–1378 (2008).
- 11 11. Kleppe, M. *et al.* JAK-STAT pathway activation in malignant and nonmalignant cells  
12 contributes to MPN pathogenesis and therapeutic response. *Cancer Discov.* **5**, 316–  
13 331 (2015).
- 14 12. Lu, Y. *et al.* Highly multiplexed profiling of single-cell effector functions reveals deep  
15 functional heterogeneity in response to pathogenic ligands. *Proc. Natl. Acad. Sci. U. S.*  
16 *A.* 607–615 (2015).
- 17 13. Zhao, P., Bhowmick, S., Yu, J. & Wang, J. Highly Multiplexed Single-Cell Protein  
18 Profiling with Large-Scale Convertible DNA-Antibody Barcoded Arrays. *Adv. Sci.*  
19 **1800672**, 1800672 (2018).
- 20 14. Mondal, M., Liao, R. & Guo, J. Highly Multiplexed Single-Cell Protein Analysis. *Chem. -*  
21 *A Eur. J.* 1–10 (2018).
- 22 15. Schubert, W. *et al.* Analyzing proteome topology and function by automated  
23 multidimensional fluorescence microscopy. *Nat. Biotechnol.* **24**, 1270–1278 (2006).
- 24 16. Gerdes, M. J. *et al.* Highly multiplexed single-cell analysis of formalin-fixed, paraffin-  
25 embedded cancer tissue. *Proc. Natl. Acad. Sci. U. S. A.* **110**, 11982–11987 (2013).
- 26 17. Lin, J.-R., Fallahi-Sichani, M. & Sorger, P. K. Highly multiplexed imaging of single cells  
27 using a high-throughput cyclic immunofluorescence method. *Nat. Commun.* **6**, 8390  
28 (2015).
- 29 18. Schweller, R. M. *et al.* Multiplexed in situ immunofluorescence using dynamic DNA  
30 complexes. *Angew. Chem. Int. Ed. Engl.* **51**, 9292–6 (2012).
- 31 19. Duose, D. Y. *et al.* Configuring robust DNA strand displacement reactions for in situ  
32 molecular analyses. *Nucleic Acids Res.* **40**, 3289–98 (2012).
- 33 20. Zrazhevskiy, P. & Gao, X. Quantum dot imaging platform for single-cell molecular  
34 profiling. *Nat. Commun.* **4**, 1619 (2013).
- 35 21. Mondal, M., Liao, R., Xiao, L., Eno, T. & Guo, J. Highly Multiplexed Single-Cell In Situ  
36 Protein Analysis with Cleavable Fluorescent Antibodies. *Angew. Chemie Int. Ed.* **56**,  
37 2636–2639 (2017).
- 38 22. Goltsev, Y. *et al.* Deep Profiling of Mouse Splenic Architecture with CODEX  
39 Multiplexed Imaging. *Cell* **174**, 968–981.e15 (2018).
- 40 23. Gut, G., Herrmann, M. D. & Pelkmans, L. Multiplexed protein maps link subcellular

- 1 organization to cellular states. *Science*. **361**, eaar7042 (2018).
- 2 24. Giesen, C. *et al.* Highly multiplexed imaging of tumor tissues with subcellular  
3 resolution by mass cytometry. *Nat. Methods* **11**, 417–422 (2014).
- 4 25. Angelo, M. *et al.* Multiplexed ion beam imaging of human breast tumors. *Nat. Med.* **20**,  
5 436–442 (2014).
- 6 26. Robertson, D., Savage, K., Reis-Filho, J. S. & Isacke, C. M. Multiple immunofluorescence  
7 labelling of formalin-fixed paraffin-embedded (FFPE) tissue. *BMC Cell Biol.* **9**, 13  
8 (2008).
- 9 27. Blow, N. Tissue preparation: Tissue issues. *Nature* **448**, 959–963 (2007).
- 10 28. Akama, K., Shirai, K. & Suzuki, S. Droplet-Free Digital Enzyme-Linked  
11 Immunosorbent Assay Based on a Tyramide Signal Amplification System. *Anal. Chem.*  
12 **88**, 7123–7129 (2016).
- 13 29. Jun, Y. W., Kim, H. R., Reo, Y. J., Dai, M. & Ahn, K. H. Addressing the autofluorescence  
14 issue in deep tissue imaging by two-photon microscopy: The significance of far-red  
15 emitting dyes. *Chem. Sci.* **8**, 7696–7704 (2017).
- 16 30. Becskei, A., Kaufmann, B. B. & van Oudenaarden, A. Contributions of low molecule  
17 number and chromosomal positioning to stochastic gene expression. *Nat. Genet.* **37**,  
18 937–944 (2005).
- 19 31. Blake, W. J., KAern, M., Cantor, C. R. & Collins, J. J. Noise in eukaryotic gene  
20 expression. *Nature* **422**, 633–637 (2003).
- 21 32. Elowitz, M. B., Levine, A. J., Siggia, E. D. & Swain, P. S. Stochastic gene expression in a  
22 single cell. *Science* **297**, 1183–1186 (2002).
- 23 33. Golding, I., Paulsson, J., Zawilski, S. M. & Cox, E. C. Real-time kinetics of gene activity  
24 in individual bacteria. *Cell* **123**, 1025–1036 (2005).
- 25 34. Ozbudak, E. M., Thattai, M., Kurtser, I., Grossman, A. D. & van Oudenaarden, A.  
26 Regulation of noise in the expression of a single gene. *Nat. Genet.* **31**, 69–73 (2002).
- 27 35. Raser, J. M. & O’Shea, E. K. Control of stochasticity in eukaryotic gene expression.  
28 *Science* **304**, 1811–1814 (2004).
- 29 36. Rosenfeld, N., Young, J. W., Alon, U., Swain, P. S. & Elowitz, M. B. Gene Regulation at  
30 the Single-Cell Level. *Science* **307**, 1962–1965 (2005).
- 31 37. Raj, A., Peskin, C. S., Tranchina, D., Vargas, D. Y. & Tyagi, S. Stochastic mRNA synthesis  
32 in mammalian cells. *PLoS Biol.* **4**, 1707–1719 (2006).
- 33 38. Munsky, B., Neuert, G. & van Oudenaarden, a. Using Gene Expression Noise to  
34 Understand Gene Regulation. *Science*. **336**, 183–187 (2012).
- 35 39. Eisen, Michael B., Spellman, Paul T., Brown, Patrick O., Botstein, D. Cluster analysis  
36 and display of genome-wide expression patterns. *Proc. Natl. Acad. Sci. USA* **95**,  
37 14863–14868 (1998).
- 38 40. Jahan, S., Sun, J.-M., He, S. & Davie, J. R. Transcription-dependent association of  
39 HDAC2 with active chromatin. *J. Cell. Physiol.* **233**, 1650–1657 (2018).

- 1 41. Lalmansingh, A. S., Urekar, C. J. & Reddi, P. P. TDP-43 is a transcriptional repressor:  
2 the testis-specific mouse *acr1* gene is a TDP-43 target in vivo. *J. Biol. Chem.* **286**,  
3 10970–10982 (2011).
- 4 42. Jean-Philippe, J., Paz, S. & Caputi, M. hnRNP A1: the Swiss army knife of gene  
5 expression. *Int. J. Mol. Sci.* **14**, 18999–19024 (2013).
- 6 43. Abdelmohsen, K. & Gorospe, M. RNA-binding protein nucleolin in disease. *RNA Biol.*  
7 **9**, 799–808 (2012).
- 8 44. Box, J. K. *et al.* Nucleophosmin: from structure and function to disease development.  
9 *BMC Mol. Biol.* **17**, 19 (2016).
- 10 45. Banerjee, A., Apponi, L. H., Pavlath, G. K. & Corbett, A. H. PABPN1: molecular function  
11 and muscle disease. *FEBS J.* **280**, 4230–4250 (2013).
- 12 46. Castella, S., Bernard, R., Corno, M., Fradin, A. & Larcher, J.-C. Ilf3 and NF90 functions  
13 in RNA biology. *Wiley Interdiscip. Rev. RNA* **6**, 243–256 (2015).
- 14 47. Lu, J. & Gao, F.-H. Role and molecular mechanism of heterogeneous nuclear  
15 ribonucleoprotein K in tumor development and progression. *Biomed. reports* **4**, 657–  
16 663 (2016).
- 17 48. Lake, B. *et al.* Neuronal subtypes and diversity revealed by single-nucleus RNA  
18 sequencing of the human brain. *Science.* **357**, 352–357 (2015).
- 19 49. Darmanis, S. *et al.* A survey of human brain transcriptome diversity at the single cell  
20 level. *Proc. Natl. Acad. Sci. U. S. A.* **112**, 7285–7290 (2015).
- 21 50. Xie, R. *et al.* Factors influencing the degradation of archival formalin-fixed paraffin-  
22 embedded tissue sections. *J. Histochem. Cytochem.* **59**, 356–365 (2011).
- 23 51. Lind, D., Franken, S., Kappler, J., Jankowski, J. & Schilling, K. Characterization of the  
24 neuronal marker NeuN as a multiply phosphorylated antigen with discrete  
25 subcellular localization. *J. Neurosci. Res.* **79**, 295–302 (2005).
- 26 52. Klune, J. R., Dhupar, R., Cardinal, J., Billiar, T. R. & Tsung, A. HMGB1: endogenous  
27 danger signaling. *Mol. Med.* **14**, 476–484 (2008).
- 28 53. Amir, E. D. *et al.* viSNE enables visualization of high dimensional single-cell data and  
29 reveals phenotypic heterogeneity of leukemia. *Nat. Biotechnol.* **31**, 545–552 (2013).
- 30 54. Stack, E. C., Wang, C., Roman, K. A. & Hoyt, C. C. Multiplexed immunohistochemistry,  
31 imaging, and quantitation: A review, with an assessment of Tyramide signal  
32 amplification, multispectral imaging and multiplex analysis. *Methods* **70**, 46–58  
33 (2014).
- 34 55. Liu, G., Amin, S., Okuhama, N. N., Liao, G. & Mingle, L. A. A quantitative evaluation of  
35 peroxidase inhibitors for tyramide signal amplification mediated cytochemistry and  
36 histochemistry. *Histochem. Cell Biol.* **126**, 283–291 (2006).
- 37 56. van de Corput, M. P., Dirks, R. W., van Gijlswijk, R. P., van de Rijke, F. M. & Raap, A. K.  
38 Fluorescence in situ hybridization using horseradish peroxidase-labeled  
39 oligodeoxynucleotides and tyramide signal amplification for sensitive DNA and  
40 mRNA detection. *Histochem. Cell Biol.* **110**, 431–437 (1998).

- 1 57. Xue, M. *et al.* Chemical methods for the simultaneous quantitation of metabolites and  
2 proteins from single cells. *J. Am. Chem. Soc.* **137**, 4066–4069 (2015).  
3 58. Wu, J., Zheng, G. & Lee, L. M. Optical imaging techniques in microfluidics and their  
4 applications. *Lab Chip* **12**, 3566–3575 (2012).

5

## 6 **Acknowledgments**

7 This work is supported by the National Institute of General Medical Sciences  
8 (1R01GM127633), the National Institute Of Allergy And Infectious Diseases  
9 (R21AI132840), Arizona State University startup funds, and Arizona State University/Mayo  
10 Clinic seed grant (ARI-219693).

11

12 **Competing financial interests:** R.L., M.M. and J.G. are inventors on a patent application  
13 filed by Arizona State University that covers the method of using cleavable fluorescent  
14 tyramide for multiplexed protein analysis.

15

16

17



1

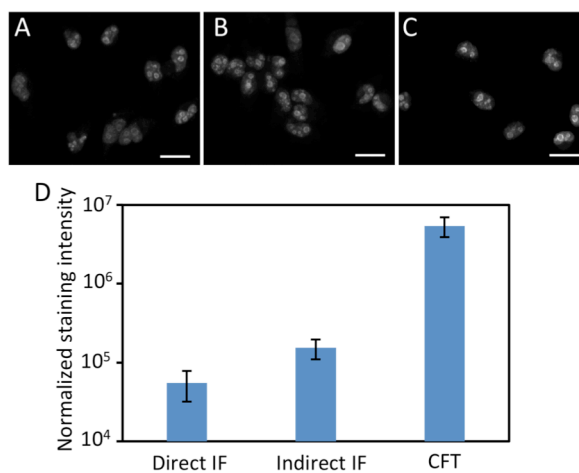

**Figure 2.** Protein Ki67 in HeLa cells are stained by (A) direct immunofluorescence (IF), (B) indirect IF, and (C) cleavable fluorescent tyramide (CFT). The images in (A), (B) and (C) are captured with the exposure time of 1 second, 300 millisecond, and 15 millisecond, respectively. (D) Normalized staining intensities of 30 different positions in (A), (B) and (C). The y-axis in (D) is on a logarithmic scale. Scale bars, 25  $\mu$ m.



1

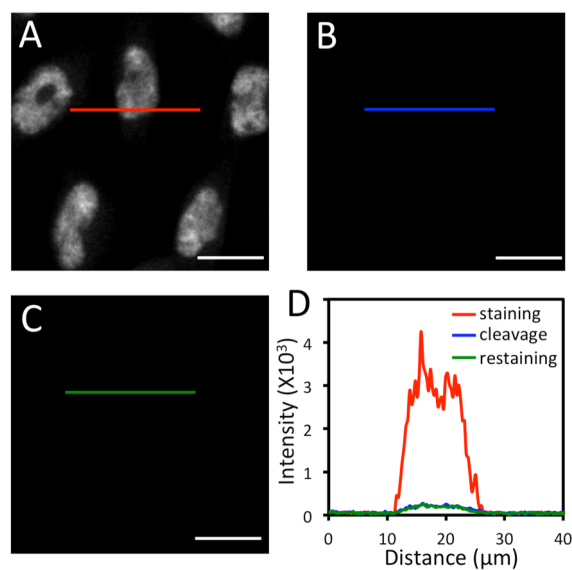

**Figure 3.** A) Protein ILF3 in HeLa cells is stained with HRP conjugated antibodies and tyramide-N<sub>3</sub>-Cy5. B) Cy5 is cleaved by TCEP. C) Cells are incubated with tyramide-N<sub>3</sub>-Cy5, again. D) Fluorescence intensity profile corresponding to the red, blue and green line positions in (A), (B) and (C). Scale bars, 20 μm.

1

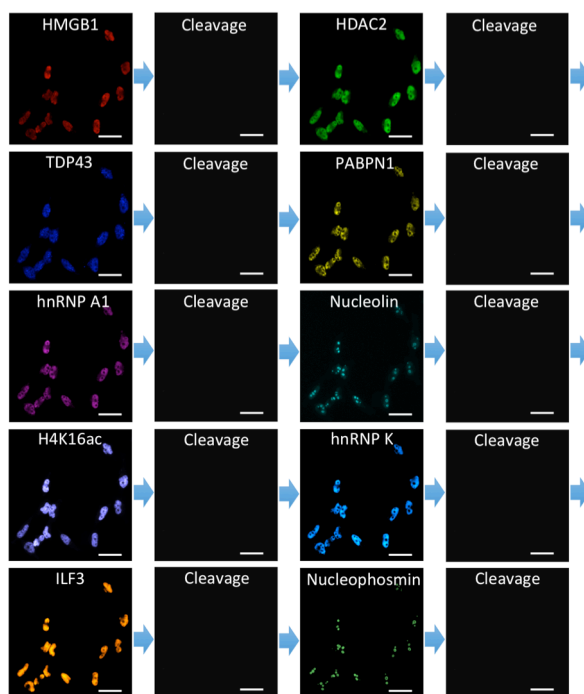

**Figure 4.** 10 different proteins are stained sequentially with the corresponding HRP conjugated antibodies and tyramide-N<sub>3</sub>-Cy5 in the same set of HeLa cells. Scale bars, 40 μm.

1

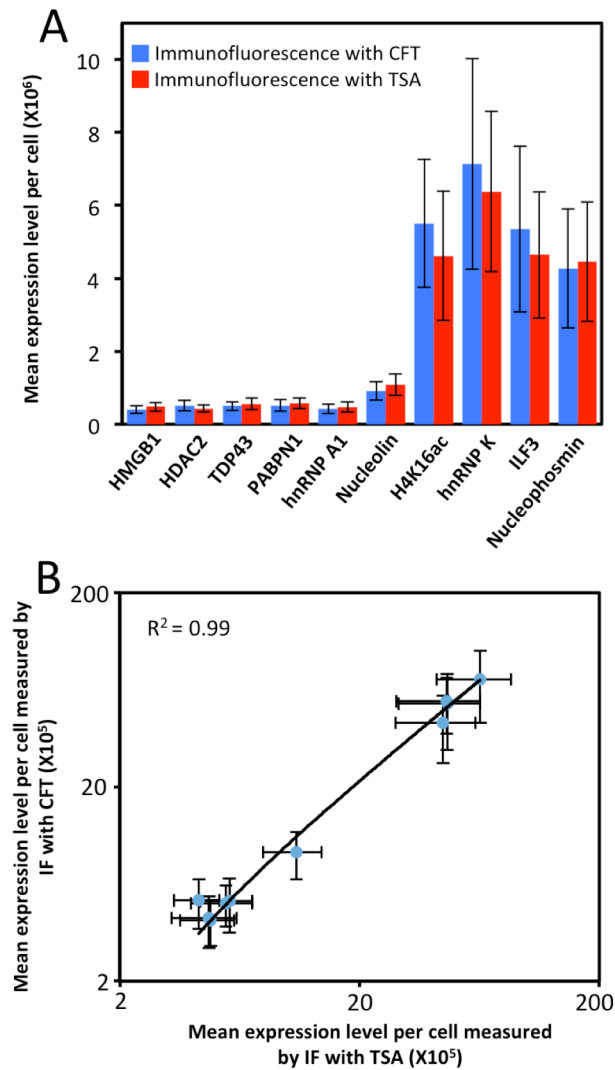

**Figure 5.** (A) Mean expression level per cell ( $n = 200$  cells) of 10 different proteins measured by immunofluorescence (IF) with cleavable fluorescent tyramide (CFT) and conventional immunofluorescence with tyramide signal amplification (TSA). (B) Comparison of the results obtained by immunofluorescence with CFT and TSA yields  $R^2 = 0.99$  with a slope of 1.13. The x and y axes in (B) are on a logarithmic scale.

1

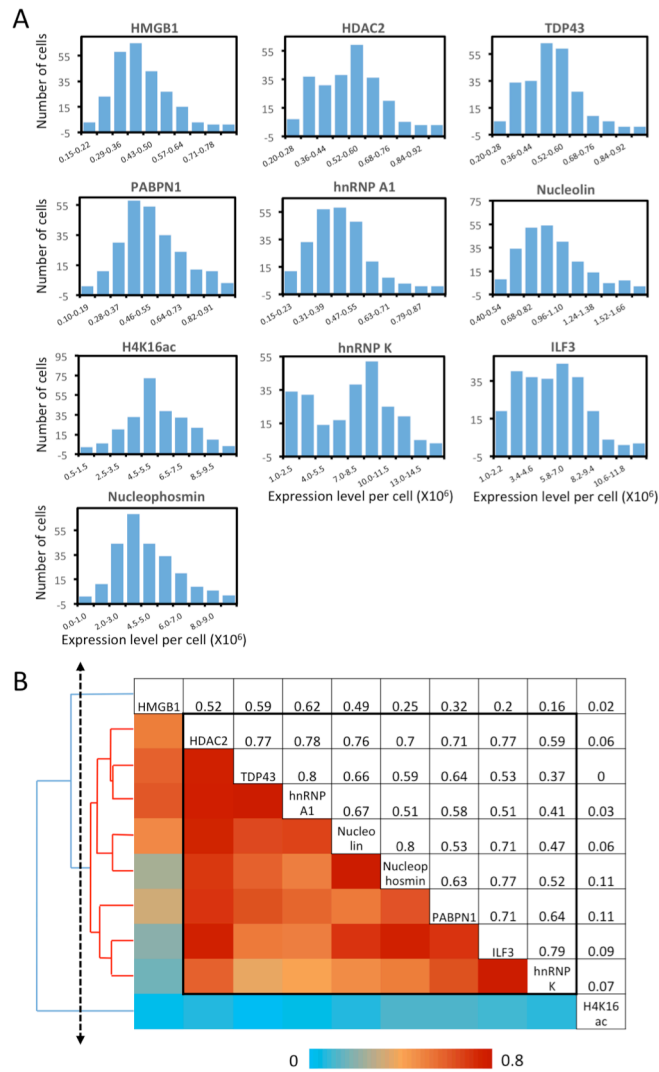

**Figure 6.** Protein expression heterogeneity and correlation. (A) Histograms of the expression level per cell of the 10 measured proteins. (B) Correlation of the expression levels of the 10 measured proteins and the hierarchical clustering tree. The upper triangle shows the expression correlation coefficient of each protein pair. The lower triangle displays the color corresponding to the correlation coefficient. And the protein names are shown in the diagonal. A group of proteins identified by a threshold on the cluster tree (dashed line) is indicated by the black box in the matrix and the red lines on the tree.

1  
2  
3  
4  
5  
6  
7  
8  
9  
10  
11  
12  
13  
14  
15  
16  
17  
18  
19  
20  
21  
22  
23  
24  
25  
26  
27  
28  
29  
30  
31  
32  
33  
34  
35  
36  
37  
38  
39  
40  
41  
42

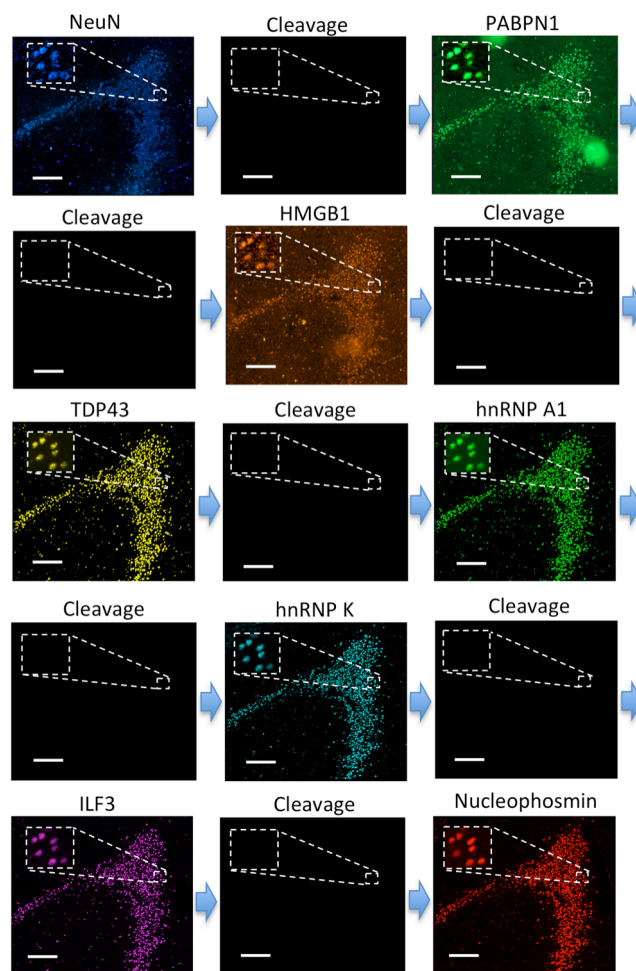

**Figure 7.** Eight different proteins are detected sequentially with HRP conjugated antibodies and tyramide- $N_3$ -Cy5 in the FFPE human brain tissue. Scale bars, 200  $\mu$ m.

1  
2  
3  
4  
5  
6  
7  
8  
9  
10  
11  
12  
13  
14  
15  
16  
17  
18  
19  
20  
21  
22  
23  
24  
25  
26  
27  
28  
29  
30  
31  
32  
33  
34

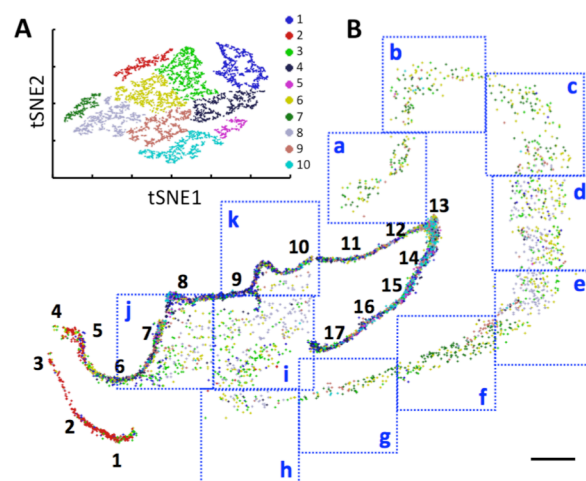

**Figure 8.** A) Over 6000 neurons in a human hippocampus are partitioned into 10 clusters. B) Anatomical locations of the individual neurons from the 10 clusters in the DG (1-17), CA1 (a-e), CA2 (f), CA3 (g,h) and CA4 (i-k). Scale bars, 2 mm.



1  
2  
3  
4  
5  
6  
7  
8  
9  
10  
11  
12  
13  
14  
15  
16  
17  
18  
19  
20  
21  
22  
23  
24  
25  
26

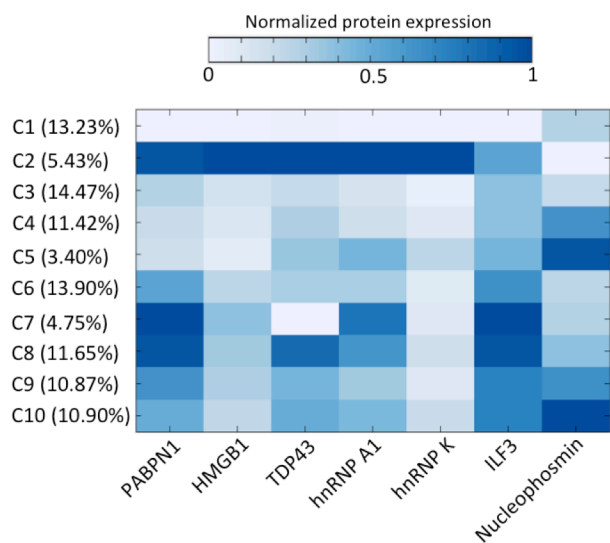

**Figure 9.** The distinct protein expression patterns in the 10 cell clusters and the percentage of cells in each cluster.

1

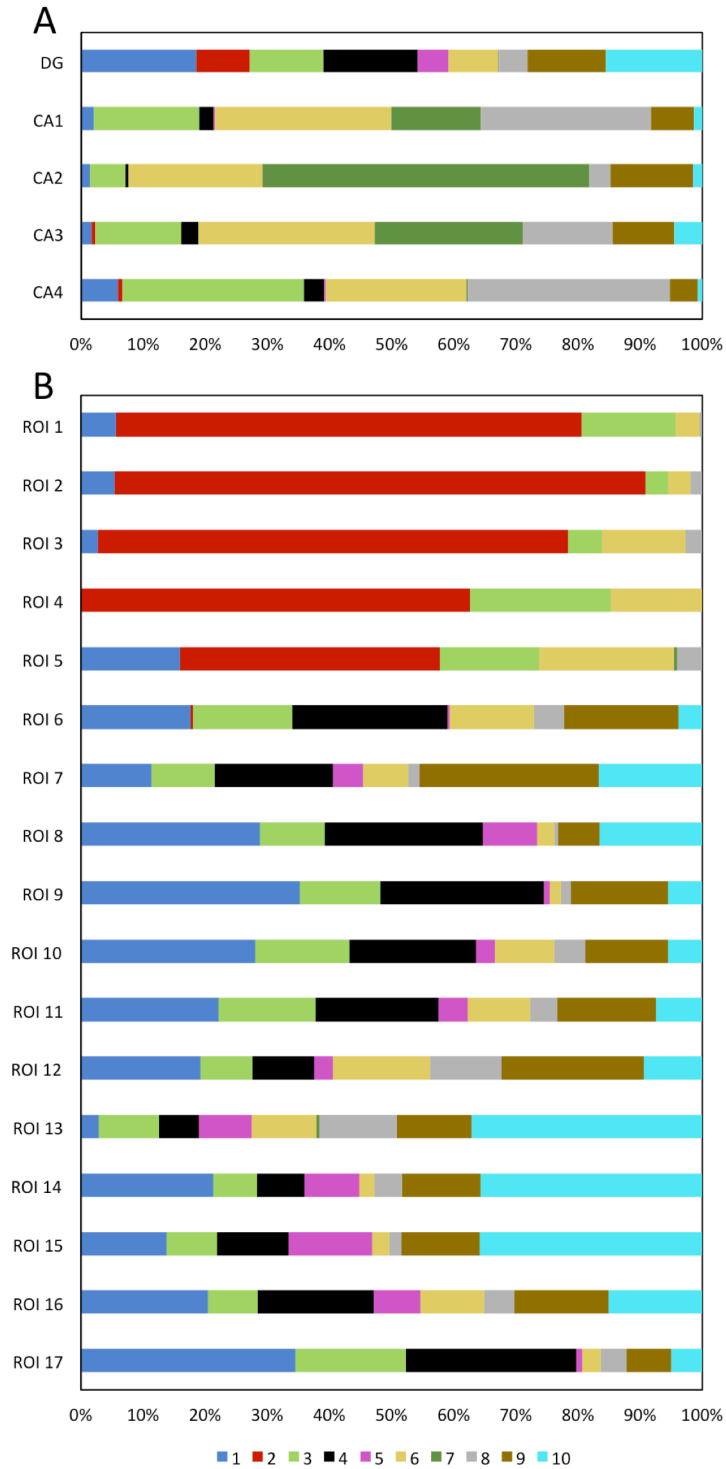

**Figure 10.** (A) The DG and CA fields are composed of neurons from different cell clusters. (B) Varied ROI in the DG are composed of neurons from different cell clusters.
